# Supplementary material for: Two novel disease-causing variants in BMPR1B are associated with brachydactyly type A1
Source: PubMed Central journal article supplement — Eur J Hum Genet. 2015 Mar 11;23(12):1640–5. doi: 10.1038/ejhg.2015.38 (PMC4795202; doi:10.1038/ejhg.2015.38), 2015-03-11
Supplement: ejhg201538x2.pdf [file ejhg201538x2.pdf]

A

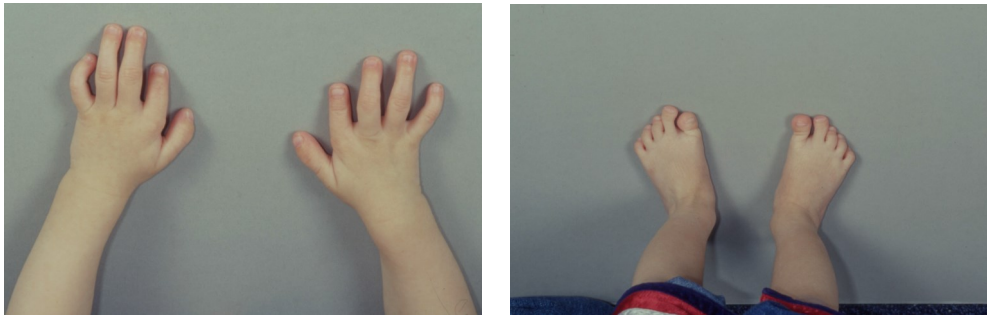

B

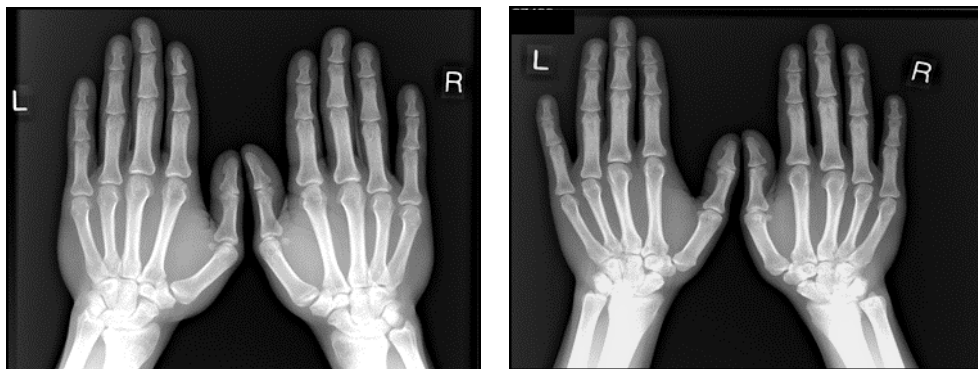

II:1

II:2

**Supplemental Figure S1. (A)** Pictures of hands and feet of Family-1 proband II:1. **(B)** Hand radiographs of Family-2 proband's father (I:1) and mother (II:2).
